1 **Kidney Damage and Associated Risk Factors in the Rural Eastern Cape, South Africa: A**  
2 **Cross-Sectional Study**

Ernesto Rosales Gonzalez<sup>1</sup>, Parimalanie Yogeswaran<sup>1</sup>, Jimmy Chandia<sup>1</sup>, Guillermo Alfredo Pulido Estrada<sup>2</sup>, Oladele Vincent Adeniyi<sup>3</sup>

**Affiliations:**

1. Department of Family Medicine and Rural Health, Faculty of Medicine and Health Sciences, Mthatha, South Africa. Email: [ernestorosalesgonzalez@gmail.com](mailto:ernestorosalesgonzalez@gmail.com).
2. Department of Public Health, Faculty of Medicine and Health Sciences, Mthatha, South Africa. Email: [pulido762@yahoo.com](mailto:pulido762@yahoo.com).
3. Department of Family Medicine and Rural Health, Faculty of Medicine and Health Sciences, East London, South Africa. Email: [vincoladele@gmail.com](mailto:vincoladele@gmail.com).

**Short title: Kidney damage and risk factors in rural South Africa**

**\*Corresponding Author:**

Dr. Ernesto Rosales Gonzalez (ERG)

Department of Family Medicine and Rural Health

Faculty of Medicine and Health Sciences

Mthatha, South Africa.

Email: [ernestorosalesgonzalez@gmail.com](mailto:ernestorosalesgonzalez@gmail.com).

3  
4  
5  
6  
7  
8  
9  
10  
11  
12  
13  
14  
15  
16  
17  
18  
19  
20  
21  
22  
23  
24

## Abstract

**Background:** The colliding epidemic of infectious and non-communicable diseases in South Africa could potentially increase the prevalence of kidney disease. This study determines the prevalence of kidney damage and known risk factors in a rural community of the Eastern Cape province, South Africa.

**Methods:** This observational cross-sectional study was conducted in the outpatient department of the Mbekweni Community Health Centre in the Eastern Cape between May and July 2022. Relevant data on demography, medical history, anthropometry and blood pressure were obtained. The glomerular filtration rate was estimated using the Chronic Kidney Disease Epidemiology Collaboration Creatinine (CKD-EPI<sub>Creatinine</sub>) equation and the re-expressed four-variable Modification of Diet in Renal Disease (MDRD) equation, without any adjustment for black ethnicity. Significant kidney damage was defined as low eGFR (<60mL/min per 1.73m<sup>2</sup>) and/or the presence of proteinuria. We used the logistic regression model analysis to identify the independent risk factors for significant kidney damage.

**Results:** The mean ( $\pm$ standard deviation) age of the 389 participants was 52.3 ( $\pm$  17.5) years. The prevalence of significant kidney damage was 17.2% (n=67), as estimated by the CKD-EPI<sub>Creatinine</sub>, with slight difference from the MDRD equation (17.7%; n=69), while the prevalence of proteinuria was 7.2%. Risk factors for significant kidney damage were older age (OR=0.94, 95% CI 0.91 - 0.96, p<0.001) and the presence of proteinuria (OR=0.98, 95% CI 0.97 - 0.99, p 0.002). Proteinuria was strongly associated with hypertension (OR=4.46, 95% CI 1.33 - 14.92, p<0.015) and elevated serum creatinine (OR=1.01, 95% CI 1 - 1.02, p=0.004).

**Conclusions:** This study found a high prevalence of kidney damage (17.2%) and proteinuria (7.2%) in this rural community, largely attributed to advanced age and hypertension, respectively. Early detection of proteinuria and decreased renal function could lead to prompt preventative measures and management to delay the progression to end-stage kidney failure and mortality.

25 **Keywords:** Chronic Kidney Disease, Eastern Cape, Proteinuria, Rural Community, South Africa

26

27

## Introduction

28 Chronic kidney disease (CKD) is a growing problem in developing countries [1,2]. In most of  
29 sub-Saharan Africa, most patients with CKD die because of a lack of adequate treatment and renal  
30 replacement therapy (RRT) [3]. Renal replacement therapy (RRT) is very expensive, making it  
31 unaffordable to people in low- and middle-income countries. Evidence suggests an increase in  
32 the demand for renal replacement therapy in South Africa, from 70 per million of the population  
33 in 1994 to 190 per million of the population in 2017, which is a more than two-fold increase [4,5].  
34 The true burden of chronic kidney disease in South Africa is unknown, owing to a lack of  
35 nationally representative studies in the country. Evidence suggests an increasing burden of non-  
36 communicable diseases in South Africa (hypertension, obesity and Type-2 diabetes mellitus)  
37 which are known risk factors for end-stage kidney disease (ESKD), particularly in black ethnic  
38 groups [6-8].

39 CKD often goes unnoticed, because there are no specific symptoms, leading to delays in diagnosis  
40 or diagnosis at an advanced stage. Investigations for CKD are very simple and freely available in  
41 South Africa. The diagnosis of CKD is made in the presence of a persistently low glomerular  
42 filtration rate (GFR), which is estimated from the serum creatinine concentration or proteinuria

43 over a period of at least three months. Evidence shows unequivocally that the Chronic Kidney  
44 Disease Epidemiology Collaboration Creatinine (CKD-EPI<sub>Creatinine</sub>) equation is more accurate  
45 than the previous Modification of Diet for Renal Disease equation [2,9]. The diagnostic  
46 challenges of CKD cannot be ignored, especially in rural communities where timeous access to  
47 relevant tests remains a concern. It has been estimated that 10% of the world's population has  
48 some degree of CKD, with trends suggesting an alarming increase in the incidence globally [10].  
49 Current data estimates that about 5 million South Africans over the age of 20 years have CKD,  
50 and in black South Africans, the figure is almost certainly higher [3,10]. In sub-Saharan Africa,  
51 the overall prevalence in the general population is 15,8 % for CKD Stages 1–3 and 4.6% for  
52 Stages 3–5 in the general population [11].

53

54 CKD complications represent a considerable burden on global healthcare resources, and only a  
55 few countries have sufficiently robust economies to meet the challenge posed by this disease [1].  
56 As such, an intensified screening programme aimed at prioritising at-risk individuals at the  
57 population level might assist in early diagnosis and management to prevent further progression  
58 to end-stage kidney failure and mortality [4]. Without a nationally representative study sample, it  
59 is difficult to gain a full understanding of the true burden of CKD in the country. Worse still, there  
60 is a paucity of published literature on CKD among people living in rural communities, especially  
61 in the Eastern Cape province. This has serious implications for crafting an effective national  
62 health promotion and disease prevention policy for the country. In order to contribute much-  
63 needed data on the burden of CKD among rural residents, which is currently unavailable in the  
64 country, this study determined the prevalence of kidney damage and examined the associated risk

65 factors among individuals accessing care at the rural Mbekweni Community Health Centre in the  
66 Eastern Cape province, South Africa.

67

## 68 **Methods**

### 69 **Ethical considerations**

70 This study received ethical approval from the Research Ethics Committee of the Faculty of  
71 Medicine and Health Sciences, Walter Sisulu University (Reference Number: 025/2017).  
72 Permission for the study's implementation was granted by the Eastern Cape Department of  
73 Health, OR Tambo District Department of Health and the facility manager. Each participant gave  
74 written informed consent, indicating voluntary participation in the study. The study was  
75 implemented in accordance with the Helsinki Declaration and Good Clinical Practice Guidelines.

76

### 77 **Study design, setting and population**

78 This observational cross-sectional study was conducted in the outpatient department of the  
79 Mbekweni Community Health Centre (CHC) in the King Sabata Dalindyebo (KSD) sub-district  
80 of OR Tambo district in the Eastern Cape between May and July 2022. This CHC serves the  
81 deeply rural residents of Mbekweni location, comprising an estimated population of 24 284  
82 inhabitants [12]. The adult population (20 years and above) of Mbekweni is estimated to be  
83 13 716 [12]. The sample size of 389 was estimated by using the free Software Epidat 3.1. Xunta  
84 de Galicia, Spain (Pan-American Health Organization/World Health Organization), using a  
85 confidence level of 95%, an expected proportion of 10%, and a maximum error of 3%.

86 In order to ensure inclusivity and minimise selection bias, participants were recruited through a  
87 simple random sampling technique; a hundred numbers were given to the adults attending the  
88 outpatient department of Mbekweni CHC, and 50 numbers were chosen randomly using the free  
89 Software Epidat 3.1. Xunta de Galicia Spain (Pan-American Health Organization/World Health  
90 Organization) run on Dr ERG's personal computer.

91 Participants were considered eligible if they were  $\geq 20$  years at the time of the study, attending  
92 the outpatient department of Mbekweni CHC, and willing to participate in the research study.  
93 However, participants were excluded if they had acute medical (vomiting, diarrhoea, burns) or  
94 psychiatric emergencies that required urgent care at the health facility, pregnancy, or any other  
95 limitations judged to interfere with study participation or their ability to follow study procedures  
96 (cognitive impairment, depression or psychotic disorders). In addition, first degree relatives of  
97 participants were excluded.

## 98 **Study procedure**

99 The lead author (ERG) and a research nurse trained in the study process implemented the protocol.  
100 The research nurse administered the interviewer-assisted questionnaire by reviewing the medical  
101 records and conducting the direct interviews, while ERG drew 5mL of venous blood sample from  
102 each consenting participant for additional investigation. Participants also submitted spot urine  
103 samples. Each questionnaire was issued a unique identifier code to link the participants' data to  
104 the laboratory investigation while maintaining privacy and confidentiality of medical information.  
105 The questionnaire comprised demographic information (age and sex), medical history (family  
106 history of hypertension and/or diabetes, current hypertension, current diabetes mellitus, current  
107 CKD and HIV) and laboratory results (urine dipstick for proteinuria, blood glucose, total

108 cholesterol, low-density lipoprotein, high-density lipoprotein triglycerides, and serum creatinine).  
109 The blood pressure, weight and height of each participant was measured by the research nurse in  
110 accordance with standard protocols. All the participants with abnormal findings (proteinuria in  
111 the urine dipstick, decreased glomerular filtration as well as dyslipidaemia were followed up for  
112 further management at the health facility by ERG.

### 113 **Measures**

114 Current kidney function was assessed by estimating the serum creatinine and confirming the  
115 presence of protein in urine samples. For the detection of proteinuria, spot urine samples were  
116 collected from the participants in specimen jars of 40mL. To avoid interpretation bias, the urine  
117 test strips were processed in a Urine Analysis Machine Model SLSSUA and interpreted as Protein  
118 Negative, Protein trace (15 mg/dL), Protein 1+ (30 mg/dL), Protein 2+ (100 mg/dL) or Protein  
119 3+ (300 mg/dL).

120 To determine the serum creatinine, 5 mL of venous blood samples were drawn by ERG (a medical  
121 doctor) from each participant and sent on ice daily to the Nelson Mandela National Health  
122 Laboratory Services for processing, in accordance with standard protocols. The estimated  
123 glomerular filtration rate (eGFR) was estimated by using the Chronic Kidney Disease  
124 Epidemiology Collaboration Creatinine (CKD-EPI<sub>creatinine</sub>) and the re-expressed four-variable  
125 Modified Diet in Renal Disease (MDRD) equations without any adjustment for black ethnicity.  
126 There is currently insufficient information in the literature about AmaXhosa people of South  
127 Africa and therefore, it is unclear which method is better at detecting kidney damage in all the  
128 diverse populations in the country [3,13].

129 Participants were classified according to the Kidney Disease Outcomes Quality Initiatives CKD  
130 classification: GFR categories (ml/min/1.73m<sup>2</sup>); G1 – Normal or High  $\geq 90$ ; G2 – Mildly

131 Decreased (60–90); G3a – Mildly to Moderately Decreased (45–59); G3b – Moderately to  
132 Severely Decreased (30–44); G4 – Severely Decreased (15–29); G5 – Kidney Failure ( $\leq 15$ ). [14]  
133 Chronic Kidney Disease (CKD) was defined as an  $eGFR < 60 \text{ ml/min/1.73}$  by  $CKD-Epi_{\text{creatinine}}$  or  
134 the presence of kidney structural abnormalities for more than three months. [14] Hypertension  
135 was defined as a persistent elevation of office blood pressure (BP) 140/90mmHg, in two or three  
136 readings several hours or days apart, or a personal history of hypertension and/or treatment with  
137 anti-hypertensive drugs [15]. Diabetes mellitus (DM) was defined as a persistent elevation of  
138 random blood sugar  $\geq 11.1 \text{ mmol/l}$  on two or more consecutive clinic visits, or a history of  
139 diabetes and/or treatment with hypoglycaemic drugs [16].

#### 140 **Statistical Analysis**

141 Data were analysed with the IBM SPSS Statistics for Windows, Version 27.0 (IBM Corp.,  
142 Armonk, New York, USA). Descriptive statistics were used to summarise the baseline  
143 characteristics and were presented as counts and frequencies for categorical variables, means ( $\pm$   
144 standard deviations) for normally distributed continuous variables, and medians (interquartile  
145 range) for non-normally distributed variables. The chi-squared test was used in the bivariate  
146 analysis to identify the association between baseline characteristics and CKD. Significant  
147 associations between the baseline characteristics and the main outcome (chronic kidney disease)  
148 were assessed by applying a multivariate logistic regression model analysis (both unadjusted and  
149 adjusted odds ratios) with a 95% confidence interval (95% CI). A p-value of less than 0.05 was  
150 considered statistically significant.

151



152

## Results

153 All 389 participants were black Africans, 69,9% of whom were females. The mean age of the  
154 participants was 52.3 ( $\pm 17.5$ ) years. The mean eGFR CK-EPI<sub>creatinine</sub> was 87,42 ( $\pm 26.93$ )  
155 ml/min/1.73m<sup>2</sup>. The prevalence of CKD (GFR categories G3–G5) was 17.22% (n=67) as  
156 determined by CK-EPI<sub>creatinine</sub>, and 17.73% (n=69) as determined by the MDRD equation. Ten  
157 participants reported prior diagnosis of CKD at the time of the study (Table 1).

158 **Table 1: Demographic and clinical characteristics of the participants**

| Variables                                                                 | Mean ( $\pm$ Standard Deviation) |
|---------------------------------------------------------------------------|----------------------------------|
| Age (Years) (n=389)                                                       | 52.36 $\pm$ 17.5                 |
| Sex (n=389)                                                               |                                  |
| Female                                                                    | 272 (69.9)                       |
| Male                                                                      | 117 (30.1)                       |
| Kidney function assessment (n=389)                                        |                                  |
| Serum Creatinine( $\mu$ mol/l)                                            | 81.02 $\pm$ 36.8                 |
| Serum Creatinine(mg/dl)                                                   | 0.92 $\pm$ 0.41                  |
| Urine Proteins (mg/dl)                                                    | 8.42 $\pm$ 19.32                 |
| Estimated Glomerular Filtration rate (ml/min/1.73m <sup>2</sup> ) (n=389) |                                  |
| eGFR CKD-Epi <sub>creatinine</sub>                                        | 87.42 $\pm$ 26.93                |
| eGFR CK MDRD                                                              | 89.08 $\pm$ 38.05                |
| Chronic Kidney Disease (CKD) (n=389)                                      |                                  |
| eGFR CKD-Epi <sub>creatinine</sub>                                        | 67 (17.22)                       |
| CKD (eGFR by MDRD)                                                        | 69 (17.73)                       |

159 CKD-EPI<sub>creatinine</sub>=Chronic Kidney Disease Epidemiology Collaboration Creatinine,  
160 MDRD=Modified Diet in Renal Disease, CKD=Chronic kidney disease

161 **Associations of CKD with potential risk factors**

162 There is a linear relationship between CKD and increasing age; prevalence ranged from 3% at  
163 30–39 years to a maximum of 32.8% at 60–69 years, followed by a decline from 28.4% at 70–79  
164 years to 16.4% at 80 years and over (p-value = 0.000) (**Fig. 1**). There were no sex differences in  
165 CKD prevalence (p = 0.4).

166 In the bivariate analysis, the following potential risk factors were significantly associated with  
167 CKD: age (p<0.001), hypertension (p<0.001), diabetes mellitus (p <0.001), HIV (p<0.001) and  
168 urine protein ( $\geq 30\text{mg/dl}$ ) (p<0.001) (Table 2).

169  
170  
171  
172  
173  
174  
175  
176  
177  
178  
179  
180

181 **Table 2: Bivariate analysis showing risk factors between participants with and without**  
 182 **CKD**

| Variables                      | CKD          | No CKD       | Unadjusted Odds Ratios | p-value |
|--------------------------------|--------------|--------------|------------------------|---------|
| Age                            | 67.82±12.94  | 49.12±15.99  | 1.08 (1.06 - 1.1)      | <.001   |
| Female                         | 49(73.13)    | 223(69.25)   | 0.83 (0.46 - 1.49)     | 0.529   |
| Hypertension                   | 60 (89.55)   | 144(44.72)   | 10.6 (4.7 - 23.89)     | <.001   |
| Diabetes mellitus              | 24 (35.82)   | 56 (17.35)   | 2.65 (1.49 - 4.72)     | <.001   |
| HIV                            | 11(16.42)    | [18]1(56.21) | 6.54 (3.3 - 12.94)     | <.001   |
| Family Hx of hypertension      | 16(23.88)    | 54(16.77)    | 0.64 (0.34 - 1.21)     | 0.17    |
| Family Hx of Diabetes mellitus | 10(14.93)    | 39(12.11)    | 0.79 (0.37 - 1.66)     | 0.529   |
| BMI                            | 24.29 ± 5.27 | 23.76 ± 5.81 | 0.98 (0.94 - 1.03)     | 0.489   |
| Urine Protein(≥30mg/dl)        | 17.4 ± 30.96 | 6.55 ± 15.29 | 1.02 (1.01 - 1.03)     | <.001   |
| Cholesterol                    | 4.46 ± 0.91  | 4.42 ± 1.12  | 0.96 (0.73 - 1.28)     | 0.802   |
| Triglycerides                  | 1.83 ± 1.01  | 1.59 ± 0.8   | 0.73 (0.44 - 1.23)     | 0.236   |

183 HIV=Human immunodeficiency virus, BMI=Body mass index, CKD=Chronic kidney disease

184 In the multiple logistic regression analysis, age and presence of proteinuria were significantly  
 185 associated with the development of CKD in the study cohort. Younger participants were less  
 186 likely to develop CKD (p<0.001, OR= 0.94, 95% CI 0.91 - 0.96) than older participants.

187 Similarly, the presence of proteinuria was more likely to be associated with CKD in the study  
188 cohort (p 0.002, OR=0.98, 95% CI 0.97 - 0.99) (Table 3).

189

190 **Table 3: Multiple logistic regression analysis of risk factors associated with CKD by CKD-**

191 **Epi<sub>creatinine</sub>**

| <b>Variables</b>                 | <b>Adjusted Odds Ratios (95% CI)</b> | <b>p-value</b> |
|----------------------------------|--------------------------------------|----------------|
| Age                              | 0.94 (0.91 – 0.96)                   | <.001          |
| Hypertension                     | 0.48 (0.16 – 1.4)                    | 0.179          |
| Diabetes mellitus                | 0.64 (0.33 – 1.23)                   | 0.[18]2        |
| HIV                              | 0.78 (0.3 – 1.98)                    | 0.595          |
| Urine Protein ( $\geq 30$ mg/dl) | 0.98 (0.97 – 0.99)                   | 0.002          |

192 HTN=hypertension; DM=Diabetes mellitus; HIV=Human immunodeficiency virus;

193 eGFR=estimated glomerular filtration rate; CKD-EPI<sub>creatinine</sub>=Chronic Kidney Disease

194 Epidemiology Collaboration Creatinine; OR=Odds ratio.

195

196 Thirty-one participants (7.97%) had significant levels of protein in the urine ( $\geq 30$  mg/dl); their

197 mean age was 56.68 ( $\pm 15.45$ ) years. In the bivariate analysis, the following potential risk factors

198 were significantly associated with proteinuria: hypertension (p = 0.001), HIV (p = 0.045) and

199 elevated Serum Creatinine ( $\mu\text{mol/l}$ ) (p <0.001). (Table 4).

200

201 **Table 4: Bivariate analysis showing association between potential risk factors and**  
202 **proteinuria**

| <b>Variables</b>          | <b>Urine Proteins<br/>≥30 mg/dl<br/>(n=31)</b> | <b>Unadjusted Odds Ratios</b> | <b>p-value</b> |
|---------------------------|------------------------------------------------|-------------------------------|----------------|
| Age                       | 56.68 ± 15.45                                  | 1.02 (0.99 – 1.04)            | 0.141          |
| Female                    | 22 (5.66)                                      | 1.06 (0.47 – 2.37)            | 0.894          |
| Hypertension              | 25 (6.43)                                      | 4.17 (1.67 – 10.4)            | 0.001          |
| Diabetes mellitus         | 9 (2.31)                                       | 1.65 (0.73 – 3.75)            | 0.243          |
| HIV                       | 10 (2.57)                                      | 0.46 (0.21 – 1.01)            | 0.045          |
| BMI                       | 24.21 ± 6.38                                   | 1.01 (0.95 – 1.08)            | 0.707          |
| Serum Creatinine (µmol/l) | 109.16 ± 90.34                                 | 1.13 (1.09 – 1.17)            | <.001          |
| Cholesterol               | 4.74 ± 1                                       | 1.32 (0.91 – 1.92)            | 0.148          |
| Triglycerides             | 1.56 ± 0.55                                    | 1.[18] (0.55 - 2.53)          | 0.674          |

203 HIV=Human immunodeficiency virus; BMI=Body mass index. Source: Participants'  
204 questionnaire. Data expressed as number (percentage) and mean ± standard deviation. Urine strip  
205 results from urine analysis machine model SLSSUA.

206 In the multiple logistic regression analysis, being hypertensive and having elevated serum  
207 creatinine remain significantly associated with the development of proteinuria in the study cohort.  
208 Individuals with HTN were four times more likely to develop proteinuria ( $p < 0.015$ , OR=4.46,  
209 95% CI 1.33 – 14.92) than individuals without HTN, and individuals with elevated serum  
210 creatinine were more likely to develop proteinuria ( $p = 0.004$ , OR=1.01, 95% CI 1 – 1.02) than  
211 those without elevated serum creatinine (Table 5).

212 **Table 5: Multiple logistic regression analysis of risk factors associated with CKD by**  
213 **proteinuria**

| Variables                              | Adjusted Odds Ratios | p-value |
|----------------------------------------|----------------------|---------|
| Hypertension                           | 4.46 (1.33 – 14.92)  | 0.015   |
| HIV                                    | 1.19 (0.43 – 3.27)   | 0.737   |
| Serum Creatinine ( $\mu\text{mol/l}$ ) | 1.01 (1 – 1.02)      | 0.004   |

214 HIV=Human immunodeficiency virus

215

## 216 Discussion

217 Despite the increasing prevalence of hypertension, diabetes mellitus and other non-communicable  
218 diseases, all known risk factors for the development of CKD in South Africa, the true burden of  
219 CKD in the country is unknown. The study reports on the prevalence of CKD and examines some  
220 of its known risk factors among the residents of a rural community accessing Mbekweni

221 Community Health Centre in the King Sabata Dalindyebo sub-district municipality of the Eastern  
222 Cape province. Findings from this study provide much-needed CKD data on the rural population  
223 of South Africa that may inform an effective kidney health prevention programme in the country.  
224 The study found a prevalence of CKD of 17.2% in the sample, with no significant differences  
225 shown between the CKD-Epi<sub>creatinine</sub> and MDRD results. This prevalence (17.2%) is higher than  
226 the 6.1% reported by Adeniyi et al among a cohort of teachers in an urban area of Cape Town in  
227 the Western Cape province in 2017 [9]. It should also be noted that in Adeniyi et al's (2017)  
228 study, there was a considerable difference between the CKD results shown by the two equations;  
229 6.1% according to MDRD and 1.8% according to CKD-EPI<sub>creatinine</sub> [9]. Similarly, the current  
230 study found a much higher prevalence of CKD than the 3.4% found by Peer et al in Cape Town  
231 in 2020 [17]. However, the prevalence of CKD in the current study is similar to the 17.3%  
232 reported by Matsha et al in Cape Town in 2013 [18]. The wide disparity in the prevalence of CKD  
233 can be explained by the peculiarities of each study population. While the participants in the  
234 current study were older (mean age 52.36 years) and had a high prevalence of hypertension  
235 (52.4%), diabetes mellitus (20.6%) and other cardiovascular risk factors, similar to the  
236 participants in Matsha et al in Cape Town [18], relatively younger (mean age 44.1–46.3 years)  
237 and more active cohorts, with a lower prevalence of cardiovascular disease, were included in  
238 Booysen et al [13], Adeniyi et al [9] and Peer et al [17].

239 Several studies have compared different glomerular filtration rate equations measured by nuclear  
240 medicine methods [13,17,20]. The authors suggest that more studies are needed to validate these  
241 equations in the diverse local populations of South Africa. Booysen et al [13] acknowledged that  
242 the CKD-Epi<sub>creatinine</sub> equation may not be as accurate for eGFR assessments among black Africans  
243 as it is among the white population. However, this equation represents the most appropriate

244 equation for detecting pre-clinical cardiac and vascular end-organ damage beyond the  
245 conventional risk factors found in black Africans [13]. Moreover, Holnes et al [21] reported that  
246 both the MDRD and CKD-EPI equations have shown satisfactory accuracy in the South African  
247 mixed-ancestry adult population.

248 In the current study, female participants were predominant (69.9%), which is not surprising, given  
249 that this cohort was drawn from the local community health centre. This is in keeping with  
250 previous studies in South Africa, where the percentages of female participants were 70.3% [3],  
251 64.1% [17] and 75.2% [18]. However, a study by Kaze et al found a slightly higher male  
252 predominance at 53.4% [19]. Although Matsha et al [18] reported a significant relationship  
253 between female sex and CKD, the current study found no significant association with sex. This  
254 is in agreement with Peer et al [17] and Kaze et al [19], whose studies demonstrated no significant  
255 association between sex and CKD. The impact of sex on CKD remains controversial; although  
256 some studies document a higher risk of developing CKD among women [18,22,23], others report  
257 higher odds among men [24–27].

258 Previous studies have reported many risk factors for the development of CKD in different  
259 population groups in South Africa, especially in the urban parts of Cape Town [9,17,18].  
260 However, such risk factors have not been sufficiently investigated in the rural communities of  
261 South Africa, especially in the Eastern Cape province. The current study showed a linear  
262 association between CKD and aging population. The mean age of the participants with CKD was  
263 67.82 years, with those above 60 years most affected. This finding corroborates the findings of  
264 Peer et al [17] and Kaze et al [19]. However, Adeniyi et al [9] reported the presence of CKD in  
265 younger age groups (mean age 47.3 years) among teachers in Cape Town.



266 The current study found a proteinuria prevalence of 7.97%, which was significantly associated  
267 with the presence of hypertension. A similar prevalence of proteinuria (7.2%) and association  
268 with hypertension was reported by Kaze et al [19]. However, a lower prevalence of proteinuria  
269 (4.5%) in a younger cohort of teachers was reported by Adeniyi et al [9]. It should be pointed out  
270 that the urine–protein creatinine ratio was not assessed in the current study, as it was in Adeniyi  
271 et al’s study [9]. Although other studies report higher rates of proteinuria among women than men  
272 [3,23,28], the current study found no association with sex. In other studies, proteinuria was not  
273 evaluated or was related to groups of participants with specific co-morbidities such as HIV ART  
274 naïve, HIV on ART, hypertension, or only diabetes mellitus [24, 29–33]

### 275 **Study limitations**

276 The study population of the rural KSD sub-district is homogenously black South Africans, which  
277 limits the generalisability of the findings to the diverse ethnicity of rural South Africa. In addition,  
278 the predominance of females in the cohort reflects a common trend in health service utilisation in  
279 South Africa, as elucidated in many population studies in the country [3,17, 18]. Notwithstanding,  
280 there was no difference by sex in the CKD prevalence in this study. Future studies on CKD  
281 prevalence should target the broader rural population of the country. Furthermore, creatinine was  
282 measured using an assay based on the Jaffe reaction, which is more susceptible to interferences  
283 than the enzymatic method.

284 Finally, the use of the CKD-EPI<sub>creatinine</sub> equation for the detection of CKD needs further validation  
285 in the local context, even though both the MDRD and CKD-EPI equations have shown a  
286 satisfactory performance in the South African mixed-ancestry adult population. The cross-  
287 sectional nature of the study design did not allow for chronicity and might have overestimated  
288 chronic kidney disease prevalence in the setting. A previous study showed an overestimation of

289 CKD in an older population and an underestimation in a younger population [34]. Although  
290 individuals with probable acute kidney injuries (vomiting, diarrhoea and burns) were excluded  
291 from the study, a repeat measurement of creatinine and proteinuria at three months would have  
292 established the diagnosis of chronic kidney disease.

## 293 **Conclusions**

294 This study found a high prevalence of significant kidney damage (17.2%) and proteinuria (7.2%)  
295 in this rural community, largely attributed to advanced age and hypertension, respectively. This  
296 finding supports the ideal hospital framework of the national Department of Health in South  
297 Africa, which focuses on screening for cardiovascular and other non-communicable diseases at  
298 every facility. Early detection of proteinuria and decreased renal function could lead to prompt  
299 initiation of preventative measures and management to delay the progression to end-stage kidney  
300 failure and mortality.

301

## 302 **Acknowledgements**

303 The authors thank the doctors and nurses of the Mbekweni Community Health Centre for their  
304 support during the study.

## 305 **Authors' contributions**

306 ERG, GAPE and PY conceptualised, designed and implemented the study protocol. ERG  
307 analysed the data and provided the initial draft. OVA and JC critically reviewed and revised the  
308 manuscript. All the authors approved the final draft for submission for publication.

309

310 **Data availability**

311 The dataset analysed in this study are available with the corresponding author after careful  
312 consideration of any written request.

313

314 **Disclosure statement**

315 All authors declare no conflict of interest.

316

317 **Funding**

318 The research project was supported by the Discovery Foundation Awards to PY (Reference:  
319 035996).

320 **References**

321 1. Abd El Hafeez S, Bolignano D, D'Arrigo G, Dounousi E, Tripepi G, Zoccali C.  
322 Prevalence and burden of chronic kidney disease among the general population and high-  
323 risk groups in Africa: a systematic review. *BMJ Open* [Internet]. 20[18] Jan;8(1):e015069.  
324 Available from: <https://bmjopen.bmj.com/content/8/1/e015069>.

325 2. Levey AS, Atkins R, Coresh J, Cohen EP, Collins AJ, Eckardt KU, et al. Chronic kidney  
326 disease as a global public health problem: approaches and initiatives – a position statement  
327 from Kidney Disease Improving Global Outcomes. *Kidney International*. 2007  
328 Aug;72(3):247–59. Available from: [https://pubmed.ncbi.nlm.nih.gov/\[17\]568785](https://pubmed.ncbi.nlm.nih.gov/[17]568785).

329 3. Krzesinski JM, Sumaili KE, Cohen E. How to tackle the avalanche of chronic kidney  
330 disease in sub-Saharan Africa: the situation in the Democratic Republic of Congo as an

- 331 example. Nephrology Dialysis Transplantation. 2006 Sep 2;22(2):332–5. Available from:  
332 [https://pubmed.ncbi.nlm.nih.gov/\[17\]035376](https://pubmed.ncbi.nlm.nih.gov/[17]035376).  
333
- 334 4. Davids MR, Marais N, Jacobs JC. South African renal registry annual report 2012.  
335 Scholarsunacza [Internet]. 2012 Apr 1 [cited 2023 Mar 20]; Available from:  
336 <http://hdl.handle.net/10019.1/95534>.
- 337 5. Davids MR, Jardine T, Marais N, Zunza M, Jacobs JC, Sebastian S. South African Renal  
338 Registry Annual Report 20[17]. *African Journal of Nephrology*. 2019;22(1):60–71.  
339 Available from: [https://www.mendeley.com/catalogue/1fbf7f45-3cd1-31d4-a1e8-  
340 4f209ddb403c](https://www.mendeley.com/catalogue/1fbf7f45-3cd1-31d4-a1e8-4f209ddb403c).
- 341 6. Moosa M R, Van der Walt I, Naicker S, Meyers A M (2015). Important causes of chronic  
342 kidney disease in South Africa. *South African Medical Journal*. 105(4), 320. Available  
343 from: <https://pubmed.ncbi.nlm.nih.gov/26294888/doi:10.7196/samj.9535>.
- 344 7. Vallianou NG, Mitesh S, Gkogkou A, Geladari E. Chronic Kidney Disease and  
345 Cardiovascular Disease: Is There Any Relationship? *Current Cardiology Reviews*  
346 [Internet]. 2019 Feb 1 [cited 2020 Nov 3];15(1):55–63. Available from:  
347 <https://www.ncbi.nlm.nih.gov/pmc/articles/PMC6367692/>

- 348 8. Alicic RZ, Rooney MT, Tuttle KR. Diabetic Kidney Disease. *Clinical Journal of the*  
349 *American Society of Nephrology* [Internet]. 20[17] May [18] [cited 2019 Aug  
350 26];12(12):2032–45. Available from: <https://cjasn.asnjournals.org/content/12/12/2032>.
- 351 9. Adeniyi AB, Laurence CE, Volmink JA, Davids MR. Prevalence of chronic kidney  
352 disease and association with cardiovascular risk factors among teachers in Cape Town,  
353 South Africa. *Clinical Kidney Journal*. 20[17] Jan [17]; sfw138. Available from:  
354 [https://pubmed.ncbi.nlm.nih.gov/286\[21\]342](https://pubmed.ncbi.nlm.nih.gov/286[21]342)  
355
- 356 10. Meyers AM. Chronic kidney disease. *South African Medical Journal*. 2015 Feb  
357 3;105(3):232. Available from: <http://www.samj.org.za/index.php/samj/article/view/9444>.
- 358 11. Kaze AD, Ilori T, Jaar BG, Echouffo-Tcheugui JB. Burden of chronic kidney disease on  
359 the African continent: a systematic review and meta-analysis. *BMC Nephrology* [Internet].  
360 20[18] Jun 1;19(1). Available from:  
361 [https://bmcnephrol.biomedcentral.com/articles/10.1\[18\]6/s12882-0\[18\]-0930-5](https://bmcnephrol.biomedcentral.com/articles/10.1[18]6/s12882-0[18]-0930-5)
- 362 12. King Sabata Dalindyebo. Annual Report 2015–2016. Available from:  
363 <https://ksd.gov.za/wp-content/uploads/2020/04/KSD-Annual-Report-2015-16.pdf>.
- 364 13. Booyesen HL, Woodiwiss AJ, Raymond A, Sareli P, Hsu HC, Dessein PH, et al. Chronic  
365 kidney disease epidemiology collaboration-derived glomerular filtration rate performs  
366 better at detecting preclinical end-organ changes than alternative equations in black

- 367 Africans. Journal of Hypertension. 2016 Jun;34(6):1[17]8–85. Available from:  
368 <https://pubmed.ncbi.nlm.nih.gov/27035736>.  
369
- 370 14. Kidney International Supplement KDIGO 20[21] Clinical Practice Guideline for the  
371 Management of Glomerular Diseases [Internet]. 20[21] Oct. Available from:  
372 [https://kdigo.org/wp-content/uploads/20\[17\]/02/KDIGO-Glomerular-Diseases-  
373 \[Guideline-20\\[21\\]-English.pdf\]\(https://kdigo.org/wp-content/uploads/20\[17\]/02/KDIGO-Glomerular-Diseases-Guideline-20\[21\]-English.pdf\)](https://kdigo.org/wp-content/uploads/20[17]/02/KDIGO-Glomerular-Diseases-Guideline-20[21]-English.pdf).
- 374 15. Seedat YK, Rayner BL, Veriava Y. South African hypertension practice guideline 2014:  
375 review article. Cardiovascular Journal of Africa [Internet]. 2014 Dec 11 [cited 2019 Nov  
376 [21]];25(6):288–94. Available from:  
377 [https://www.ncbi.nlm.nih.gov/pmc/articles/PMC4327\[18\]1/](https://www.ncbi.nlm.nih.gov/pmc/articles/PMC4327[18]1/)
- 378 16. SEMDSA 20[17] Guidelines for the Management of Type 2 diabetes mellitus. SEMDSA  
379 Type 2 Diabetes Guidelines Expert Committee. JEMDSA 20[17]; 22(1) (Supplement 1):  
380 S1-S196.
- 381 17. Peer N, George J, Lombard C, Steyn K, Levitt N, Kengne AP. Prevalence, concordance  
382 and associations of chronic kidney disease by five estimators in South Africa. *BMC*  
383 *Nephrology*. 2020 Aug 27;[21](1). Available from:  
384 <https://pubmed.ncbi.nlm.nih.gov/32854641>.

- 385 18. Matsha TE, Yako YY, Rensburg MA, Hassan MS, Kengne AP, Erasmus RT. Chronic  
386 kidney diseases in mixed ancestry south African populations: prevalence, determinants,  
387 and concordance between kidney function estimators. BMC Nephrology. 2013 Apr  
388 2;14(1). Available from: <http://www.biomedcentral.com/1471-2369/14/75>.
- 389 19. Kaze FF, Halle MP, Mopa HT, Ashuntantang G, Fouda H, Ngogang J, et al. Prevalence  
390 and risk factors of chronic kidney disease in urban adult Cameroonians according to three  
391 common estimators of the glomerular filtration rate: a cross-sectional study. BMC  
392 Nephrology. 2015 Jul 7;16(1). Available from:  
393 <https://pubmed.ncbi.nlm.nih.gov/26149764>.
- 394 20. Moodley N, Hariparshad S, Peer F, Gounden V. Evaluation of the CKD-EPI creatinine-  
395 based glomerular filtration rate estimating equation in Black African and Indian adults in  
396 KwaZulu-Natal, South Africa. Clinical Biochemistry. 20[18] Sep; 59:43–9. Available  
397 from: [https://doi.org/10.1016/j.clinbiochem.20\[18\].06.014](https://doi.org/10.1016/j.clinbiochem.20[18].06.014).
- 398 21. Holness JL, Bezuidenhout K, Davids MR, Warwick JM. Validation of equations to  
399 estimate glomerular filtration rate in South Africans of mixed ancestry. S Afr Med J. 2020  
400 Feb 26;110(3):229-234. doi: 10.7196/SAMJ.2020.v110i3.13995. PMID: 32657701.  
401 Available from: <https://pubmed.ncbi.nlm.nih.gov/32657701/>
- 402 22. Rodriguez-Poncelas A, Garre-Olmo J, Franch-Nadal J, Diez-Espino J, Mundet-Tuduri X,  
403 Barrot-De la Puente J, et al. RedGDPS Study Group. Prevalence of chronic kidney disease

404 in patients with type 2 diabetes in Spain: PERCEDIME2 study. BMC Nephrology. 2013  
405 Feb 22;14:46. doi: 10.1[18]6/1471-2369-14-46. PMID: 23433046; PMCID:  
406 PMC3598539.). Available from: [https://doi.org/10.1\[18\]6/1471-2369-14-46](https://doi.org/10.1[18]6/1471-2369-14-46)

407 23. Ephraim RK, Arthur E, Owiredu WK, Adoba P, Agbodzakey H, Eghan BA. Chronic  
408 kidney disease stages among diabetes patients in the Cape Coast Metropolis. Saudi J  
409 Kidney Dis Transpl. 2016 Nov-Dec;27(6):1231-1238. doi: 10.4103/1319-2442.194658.  
410 PMID: 27900971. Available from: [https://www.researchgate.net/profile/Prince-](https://www.researchgate.net/profile/Prince-Adoba/publication/311427986_Chronic_kidney...)  
411 [Adoba/publication/311427986\\_Chronic\\_kidney...](https://www.researchgate.net/profile/Prince-Adoba/publication/311427986_Chronic_kidney...)

412 24. Adeniyi OV, Owolabi EO. Cross-sectional study of diabetes kidney disease in the Eastern  
413 Cape, South Africa. Medicine (Baltimore). 2020 Dec 11;99(50):e23303. doi:  
414 10.1097/MD.00000000000023303. PMID: 33327258; PMCID: PMC7738037. Available  
415 from: <https://pubmed.ncbi.nlm.nih.gov/33327258/>

416 25. Nitta, K., Goto, S., Masakane, I., Hanafusa, N., Taniguchi, M., Hasegawa, T. et al Renal  
417 Data Registry Committee, D. T. (2020). Annual dialysis data report for 20[18], JSDT  
418 Renal Data Registry: Survey methods, facility data, incidence, prevalence, and mortality.  
419 Renal Replacement Therapy, 6(1), 1-[18]. [https://doi.org/10.1\[18\]6/s41100-020-00286-9](https://doi.org/10.1[18]6/s41100-020-00286-9).  
420 Available from: [https://doi.org/10.1\[18\]6/s41100-020-00286-9](https://doi.org/10.1[18]6/s41100-020-00286-9)



- 421 26. Wang, N., Pei, J., Fan, H. et al. Emergency department use by patients with end-stage  
422 renal disease in the United States. *BMC Emerg Med* [21], 25 (20[21]). Available from:  
423 <https://doi.org/10.1186/s12873-021-00420-8>  
424
- 425 27. Provenzano M, De Nicola L, Pena MJ, Capitoli G, Garofalo C, Borrelli S, et al. Precision  
426 nephrology is a non-negligible state of mind in clinical research: remember the past to  
427 face the future. *Nephron*. 2020;144(10):463-478. doi: 10.1159/000508983. Epub 2020  
428 Aug [18]. PMID: 32810859. Available from:  
429 <https://www.karger.com/Article/FullText/508983>
- 430 28. Van Rensburg BW, Van Staden AM, Rossouw GJ, Joubert G. The profile of adult  
431 nephrology patients admitted to the Renal Unit of the Universitas Tertiary Hospital in  
432 Bloemfontein, South Africa from 1997 to 2006. *Nephrol Dial Transplant*. 2010  
433 Mar;25(3):820-4. doi: 10.1093/ndt/gfp535. Epub 2009 Oct 28. PMID:  
434 19875380. Available from: <https://doi.org/10.1093/ndt/gfp535>
- 435 29. Peck R, Baisley K, Kavishe B, Were J, Mghamba J, Smeeth L, Grosskurth H, Kapiga S.  
436 Decreased renal function and associated factors in cities, towns and rural areas of  
437 Tanzania: a community-based population survey. *Trop Med Int Health*. 2016  
438 Mar;[21](3):393-404. doi: 10.1111/tmi.12651. Epub 2015 Dec 28. PMID: 26644310;  
439 PMCID: PMC4784164. Available from: <https://doi.org/10.1111/tmi.12651>

- 440 30. Dessein PH, Hsu HC, Tsang L, Millen AM, Woodiwiss AJ, Norton GR, et al. Kidney  
441 function, endothelial activation and atherosclerosis in black and white Africans with  
442 rheumatoid arthritis. PLoS One. 2015 Mar 25;10(3): e01[21]693. PMID: 25806966;  
443 PMCID: PMC4373952. Available from: [https://doi.org/10.1371/journal.pone.01\[21\]693](https://doi.org/10.1371/journal.pone.01[21]693)
- 444 31. Adebamowo SN, Adeyemo AA, Tekola-Ayele F, Doumatey AP, Bentley AR, Chen G, et  
445 al. Impact of Type 2 diabetes on impaired kidney function in sub-Saharan African  
446 populations. Front Endocrinol (Lausanne). 2016 May 30;7:50. doi:  
447 10.3389/fendo.2016.00050. PMID: 27303364; PMCID: PMC4884893. Available from:  
448 <https://pubmed.ncbi.nlm.nih.gov/27303364/>
- 449 32. Odongo P, Wanyama R, Obol JH, Apiyo P, Byakika-Kibwika P. Impaired renal function  
450 and associated risk factors in newly diagnosed HIV-infected adults in Gulu Hospital,  
451 Northern Uganda. BMC Nephrol. 2015 Mar 31;16:43. doi: 10.1186/s12882-015-0035-3.  
452 PMID: 25881003; PMCID: PMC4381399. Available from:  
453 <https://pubmed.ncbi.nlm.nih.gov/25881003/>
- 454 33. Mekuria Y, Yilma D, Mekonnen Z, Kassa T, Gedefaw L. Renal function impairment and  
455 associated factors among HAART naïve and experienced adult HIV positive individuals  
456 in Southwest Ethiopia: A comparative cross sectional study. PLoS One. 2016 Aug  
457 18;11(8): e0161180. doi: 10.1371/journal.pone.0161180. PMID: 27537338; PMCID:  
458 PMC4990167. Available from: <https://pubmed.ncbi.nlm.nih.gov/27537338/>.
- 459

460 34. Gharbi MB, Elseviers M, Zamd M, Alaoui AB, Benahadi N, Trabelssi EH, Bayahia R,  
461 Ramdani B, De Broe ME. Chronic kidney disease, hypertension, diabetes, and obesity in  
462 the adult population of Morocco: how to avoid “over”-and “under”-diagnosis of CKD.  
463 Kidney international. 2016 Jun 1;89(6):1363-71. Available from:  
464 <https://doi.org/10.1016/j.kint.2016.02.019>.

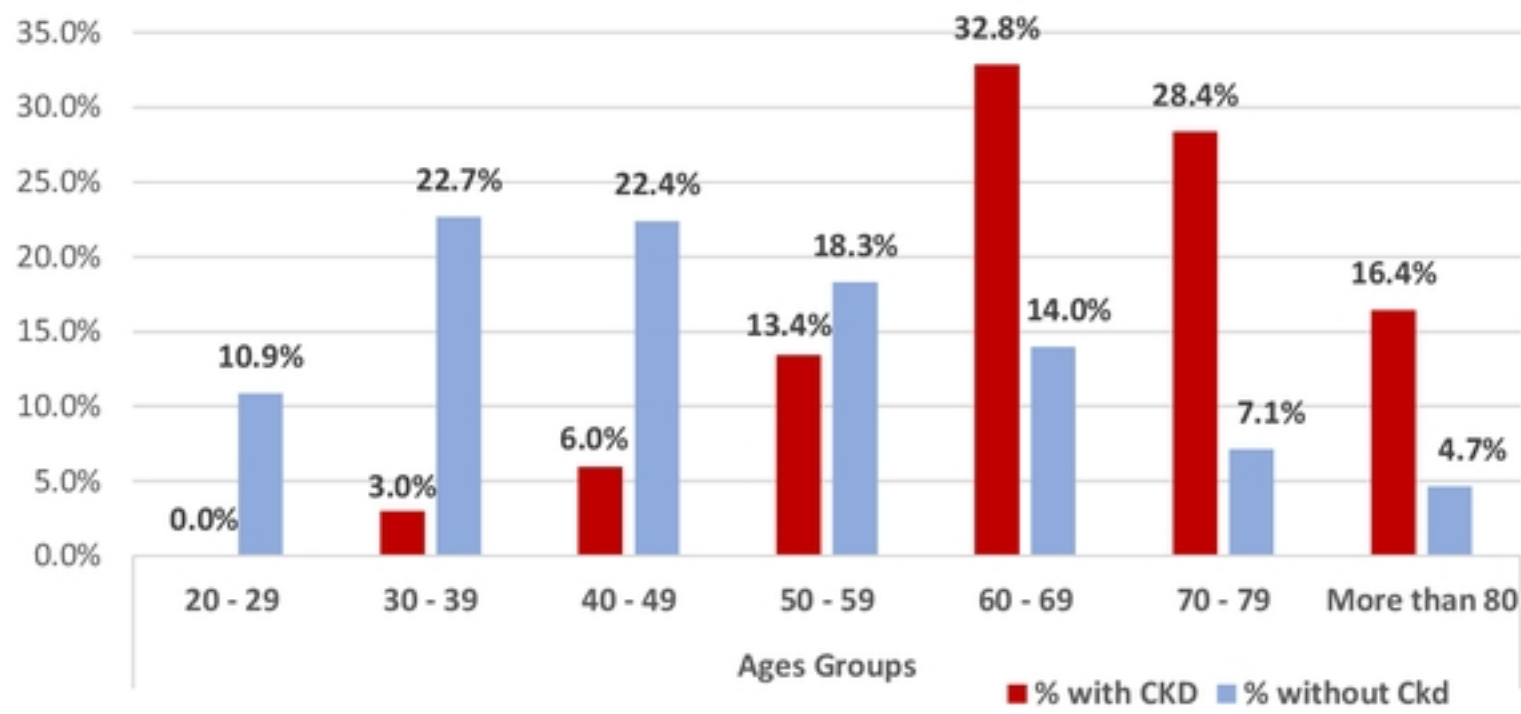

**Fig. 1: Association between CKD-EPI<sub>creatinine</sub> and age categories (p=0.000)**

medRxiv preprint doi: <https://doi.org/10.1101/2023.09.21.23295885>; this version posted September 25, 2023. The copyright holder for this preprint (which was not certified by peer review) is the author/funder, who has granted medRxiv a license to display the preprint in perpetuity.

It is made available under a [CC-BY 4.0 International license](https://creativecommons.org/licenses/by/4.0/).
